# Supplementary material for: Dietary Patterns Based on Estimated Glomerular Filtration Rate and Kidney Function Decline in the General Population: The Lifelines Cohort Study
Source: PubMed Central journal article supplement (PMC7230954; doi:10.3390/nu12041099), 2020-04-16
Supplement: nutrients-12-01099-s001.pdf [file nutrients-12-01099-s001.pdf]

## Supplementary Materials

Table S1. Classification of FFQ items in the 50 established food groups in Lifelines cohort

Table S2. Factor loading of all the food groups obtained by RRR in women

Table S3. Factor loading of all the food groups obtained by RRR in men

Table S4. Baseline characteristics based on eGFR-based dietary patterns in women

Table S5. Baseline characteristics based on eGFR-based dietary patterns in men

Table S6. Risk of a  $\geq 20\%$  eGFR decline according to baseline Mediterranean Diet Score (0-9) by logistic regression

Table S7. Risk of CKD incidence according to baseline Mediterranean Diet Score (0-9) by logistic regression

Figure S1. Flow chart of participant selection

**Table S1. Classification of FFQ items in the 50 established food groups in Lifelines cohort**

| <b>Food Groups</b>       | <b>FFQ items in Lifelines</b>                                                                                                                    |
|--------------------------|--------------------------------------------------------------------------------------------------------------------------------------------------|
| Bread and bread products | Rusk, crispbread, crackers, croissants, slices of bread, and other bread                                                                         |
| Rice & Pasta             | Rice, pasta                                                                                                                                      |
| Cereals                  | Muesli, granola or cereals for the preparation of porridges                                                                                      |
| Potatoes                 | Boiled or mashed potatoes                                                                                                                        |
| Pizza                    | Pizza                                                                                                                                            |
| Milk (low/medium fat)    | Semi-skimmed/ skimmed milk, regular coffee milk                                                                                                  |
| Milk (full fat)          | Full-fat milk, full-fat coffee milk, butter milk,                                                                                                |
| Yogurt (low fat)         | Semi-skimmed plain yogurt                                                                                                                        |
| Yogurt (high fat)        | Full-fat plain yogurt                                                                                                                            |
| Chocolate milk           | Chocolate milk                                                                                                                                   |
| Sweetened dairy drinks   | Sugar sweetened milk/yoghurt drinks and other types of dairy drinks, skimmed fruit yogurt and quark or fruit quark                               |
| Cheese( low fat)         | 20+ or 30+ cheese or spreadable cheese                                                                                                           |
| Cheese (high fat)        | 40+ or 48+ cheese or spreadable cheese, cream cheese and/or foreign cheese                                                                       |
| Cream products           | Whipped cream, coffee cream                                                                                                                      |
| Milk-based desserts      | Full-fat custard, milk-based ice cream                                                                                                           |
| Eggs                     | Boiled egg, fried egg                                                                                                                            |
| Lean red meat            | Beef steak, steak tartare, braising steak or roast beef                                                                                          |
| Red meat                 | Sirloin steak, beef bratwurst, beef blade steak, beef rib steak or marbled beef, pork bratwurst, 'slavink' (ground meat wrapped in bacon), pork, |
| Fatty fish               | Salted herring, fried herring, salmon, mackerel, eel and other types of fish                                                                     |
| Lean fish                | Cod, plaice, haddock, pollack, sole, deep-fried whiting                                                                                          |
| White meat               | Chicken without skin, chicken with skin                                                                                                          |
| Processed meat           | Luncheon meats, burger meat, bacon, minced meat (beef or mix of beef and pork), sausage or smoked sausages and other types of meat products      |
| Other meat               | Other types of meat or poultry                                                                                                                   |
| Nuts and seeds           | Peanuts, nuts and seeds, pea-nut butter                                                                                                          |
| Legumes                  | Brown beans, white beans, marrowfat peas, kidney beans etc.                                                                                      |
| Soup                     | Soup with or without legumes                                                                                                                     |
| Warm Sauces              | Pasta sauce, mushroom sauce, sate sauce                                                                                                          |

|                              |                                                                                                                                 |
|------------------------------|---------------------------------------------------------------------------------------------------------------------------------|
| Sauces /dressing/gravy       | Regular mayonnaise, low fat mayonnaise, sauce for French fries and other non-red sauces, gravy, salad dressing with/without oil |
| Edible fat                   | Butter, margarine, low fat margarine                                                                                            |
| Commercially prepared dishes | Chinese/Indonesian dishes, meals from fast-food restaurants, other types of ready-to-eat meals                                  |
| Breakfast drinks             | Ready –to-drink breakfast                                                                                                       |
| Fruits                       | All kinds of fruits                                                                                                             |
| Apple sauce                  | Apple sauce                                                                                                                     |
| Vegetables                   | Cooked vegetables with/without butter, stir-fried vegetables                                                                    |
| Fruit juice                  | Fruit juice / drink                                                                                                             |
| Fries                        | Fries and fried potatoes                                                                                                        |
| Cakes and cookies            | Small cookies or biscuits, sponge cake, large cookies, cake, pastry, pie                                                        |
| Savory snacks                | Croquettes, savory snacks, potato chips or salty biscuits                                                                       |
| Sugar and confectionery      | Candy bars or candy, chocolate, liquorice, acid drops                                                                           |
| Sweet sandwich toppings      | chocolate- sprinkles, spread or flakes and other types of sweet fillings                                                        |
| Savory salad topping         | Salads or spread on baguette / toast                                                                                            |
| Wine & fortified wine        | Red /rose/white wine, fortified wine (sherry, port, vermouth, madeira)                                                          |
| Beer                         | Beer                                                                                                                            |
| Non-alcoholic beer           | Alcohol-free beer                                                                                                               |
| Spirits                      | Distilled beverages(genever, whisky, rum, gin, cognac, vieux, liqueur) and others                                               |
| High Sugar beverages         | Sugar sweetened beverages such as soft drinks (coke, orange flavored soft drinks, 7-up) or lemonade with sugar                  |
| Low Sugar beverages          | Soft drinks / lemonade without sugar                                                                                            |
| Coffee                       | Coffee with or without sugar and milk, coffee creamer                                                                           |
| Tea                          | Tea with or without sugar                                                                                                       |
| Added sugar                  | Sugar in yoghurt, thee, coffee                                                                                                  |

**Table S2. Factor loading of all the food groups obtained by RRR in women**

| <b>Food group</b>            | <b>Factor loading</b> |
|------------------------------|-----------------------|
| Eggs                         | 0.42                  |
| Low-fat cheese               | 0.23                  |
| High-fat cheese              | 0.23                  |
| Legumes                      | 0.20                  |
| Savory snacks                | 0.16                  |
| Fatty fish                   | 0.15                  |
| Vegetables                   | 0.13                  |
| Low Sugar beverages          | 0.13                  |
| Soup                         | 0.11                  |
| Bread                        | 0.10                  |
| Spirits                      | 0.10                  |
| Fruits                       | 0.09                  |
| Wine & fortified wine        | 0.07                  |
| Beer                         | 0.06                  |
| Full-fat milk                | 0.04                  |
| Sauces dressing gravy        | 0.04                  |
| Non-alcoholic beer           | 0.04                  |
| Low-fat milk                 | 0.03                  |
| Lean fish                    | 0.03                  |
| Processed meat               | 0.01                  |
| Nuts seeds                   | 0.01                  |
| Edible fat                   | 0.01                  |
| Breakfast drinking           | 0.01                  |
| Fruits juice                 | -0.01                 |
| Potatoes                     | -0.01                 |
| Chocolate milk               | -0.02                 |
| Full-fat yogurt              | -0.03                 |
| Cream                        | -0.04                 |
| Low-fat yogurt               | -0.05                 |
| Apple sauce                  | -0.05                 |
| Coffee                       | -0.06                 |
| Savory salad topping         | -0.07                 |
| Tea                          | -0.07                 |
| Pizza                        | -0.08                 |
| Fries                        | -0.08                 |
| High sugar beverages         | -0.08                 |
| Rice&pasta                   | -0.09                 |
| Warm sauces                  | -0.10                 |
| Added sugar                  | -0.10                 |
| Lean red meat                | -0.13                 |
| Cereals                      | -0.16                 |
| other meat                   | -0.16                 |
| Red meat                     | -0.17                 |
| Sugar and confectionery      | -0.18                 |
| Commercially prepared dishes | -0.21                 |
| White meat                   | -0.22                 |
| Sweet sandwich toppings      | -0.22                 |
| Cakes and cookies            | -0.24                 |
| Dessert                      | -0.26                 |
| Sweetened dairy drinks       | -0.27                 |

**Table S3. Factor loading of all the food groups obtained by RRR in men**

| <b>Food group</b>            | <b>Factor loading</b> |
|------------------------------|-----------------------|
| High-fat cheese              | 0.38                  |
| Bread                        | 0.34                  |
| Full-fat milk                | 0.23                  |
| Fruits                       | 0.23                  |
| Vegetables                   | 0.21                  |
| Beer                         | 0.21                  |
| Low-fat cheese               | 0.20                  |
| Legumes                      | 0.20                  |
| Potatoes                     | 0.19                  |
| Edible fat                   | 0.16                  |
| Eggs                         | 0.15                  |
| Low-fat yogurt               | 0.12                  |
| Nuts seeds                   | 0.11                  |
| Savory salad topping         | 0.10                  |
| Full-fat yogurt              | 0.09                  |
| Apple sauce                  | 0.07                  |
| Wine & fortified wine        | 0.06                  |
| Low Sugar beverages          | 0.06                  |
| Chocolate milk               | 0.05                  |
| Warm sauces                  | 0.05                  |
| Cakes and cookies            | 0.05                  |
| Coffee                       | 0.05                  |
| Fruits juice                 | 0.04                  |
| Non-alcoholic beer           | 0.04                  |
| Spirits                      | 0.04                  |
| Soup                         | 0.03                  |
| Lean fish                    | 0.02                  |
| Tea                          | 0.02                  |
| Fatty fish                   | 0.01                  |
| Savory snacks                | 0.01                  |
| Sweet sandwich toppings      | 0.01                  |
| Cereals                      | 0.01                  |
| Dessert                      | -0.01                 |
| Low-fat milk                 | -0.03                 |
| Processed meat               | -0.03                 |
| Sauces dressing gravy        | -0.03                 |
| Breakfast drinking           | -0.03                 |
| Rice&pasta                   | -0.05                 |
| High sugar beverages         | -0.05                 |
| Added sugar                  | -0.06                 |
| Pizza                        | -0.07                 |
| Sweetened dairy drinks       | -0.08                 |
| Cream                        | -0.09                 |
| Fries                        | -0.12                 |
| Sugar and confectionery      | -0.12                 |
| Lean red meat                | -0.17                 |
| other meat                   | -0.17                 |
| Commercially prepared dishes | -0.17                 |
| Red meat                     | -0.22                 |
| White meat                   | -0.33                 |

**Table S4. Baseline characteristics based on eGFR-based dietary patterns in women**

|                                            | Quartiles of dietary pattern score in women ( <i>n</i> = 45,746) |              |              |              |
|--------------------------------------------|------------------------------------------------------------------|--------------|--------------|--------------|
|                                            | 1                                                                | 2            | 3            | 4            |
| <b>Demographics</b>                        |                                                                  |              |              |              |
| Age (year)                                 | 41.9±11.8                                                        | 44.4±12.5    | 46.3±12.7    | 48.8±12.1    |
| <b>Clinical factors</b>                    |                                                                  |              |              |              |
| Body surface area (m <sup>2</sup> )        | 1.84±0.16                                                        | 1.84±0.16    | 1.83±0.16    | 1.84±0.16    |
| 24h urine creatinine clearance (mL/min)    | 117.7±26.6                                                       | 116.5±27.2   | 114.6±28.0   | 114.5±28.2   |
| Serum creatinine (μmol/L)                  | 67.8±8.8                                                         | 67.1±8.7     | 66.7±8.8     | 65.6±8.9     |
| eGFR (mL/min/1.73 m <sup>2</sup> )         | 96.3±14.4                                                        | 95.6±14.6    | 94.9±14.4    | 94.6±14.0    |
| BMI (kg/m <sup>2</sup> )                   | 25.4±4.5                                                         | 25.7±4.8     | 25.8±4.5     | 26.0±4.6     |
| Weight (kg)                                | 73.5±13.5                                                        | 73.8±13.2    | 73.6±13.1    | 74.0±13.6    |
| Waist circumference (cm)                   | 85.6±11.8                                                        | 86.3±11.7    | 86.7±11.8    | 87.4±12.1    |
| Cholesterol (mmol/L)                       | 5.0±1.0                                                          | 5.0±1.0      | 5.1±1.0      | 5.2±1.0      |
| Triglycerides (mmol/L)                     | 0.9±0.5                                                          | 0.9±0.5      | 1.0±0.6      | 1.0±0.6      |
| Diabetes (%)                               | 2.1                                                              | 2.2          | 3.2          | 3.7          |
| Hypertension (%)                           | 19.5                                                             | 22.2         | 24.7         | 26.8         |
| Cardiovascular disease (%)                 | 0.9                                                              | 1.5          | 1.8          | 2.2          |
| <b>Health-related behaviors</b>            |                                                                  |              |              |              |
| Physical activity (minutes/week)           | 300 (120-644)                                                    | 360(150-730) | 388(150-810) | 450(180-900) |
| Smoker (%)                                 | 11.1                                                             | 13.7         | 17.1         | 19.5         |
| Total energy intake (kcal/d)               | 2076±453                                                         | 1858±422     | 1745±433     | 1738±479     |
| Total protein intake (g/day/1000kcal)      | 35.8±5.0                                                         | 37.4±5.1     | 38.5±5.4     | 40.3±6.5     |
| Total carbohydrate intake (g/day/1000kcal) | 117.5±11.3                                                       | 114.3±12.0   | 112.1±13.3   | 106.5±16.5   |
| Total fat intake (g/day/1000kcal)          | 39.0±4.8                                                         | 39.1±5.1     | 39.0±6.5     | 39.7±6.5     |
| <b>Socioeconomic status</b>                |                                                                  |              |              |              |
| <b>Education (%)</b>                       |                                                                  |              |              |              |
| Low                                        | 23.2                                                             | 27.9         | 31.6         | 33.9         |
| Middle                                     | 45.4                                                             | 43.4         | 39.3         | 36.5         |
| High                                       | 31.0                                                             | 28.4         | 28.6         | 29.1         |
| Unknown/no answer                          | 0.4                                                              | 0.4          | 0.5          | 0.5          |
| <b>Income (%)</b>                          |                                                                  |              |              |              |

|                   |      |      |      |      |
|-------------------|------|------|------|------|
| Low               | 8.0  | 7.2  | 7.8  | 7.7  |
| Middle            | 47.7 | 48.2 | 48.8 | 48.5 |
| High              | 27.7 | 28.0 | 26.5 | 26.6 |
| Unknown/no answer | 16.7 | 16.6 | 16.9 | 17.3 |

---

Data are % , means  $\pm$  sd or median (IQR 25%-75%)

**Table S5. Baseline characteristics based on eGFR-based dietary patterns in men**

| <b>Characteristics</b>                  | <b>Quartiles of dietary pattern score in men (n =32,589)</b> |               |               |               |
|-----------------------------------------|--------------------------------------------------------------|---------------|---------------|---------------|
|                                         | <b>1</b>                                                     | <b>2</b>      | <b>3</b>      | <b>4</b>      |
| <b>Demographics</b>                     |                                                              |               |               |               |
| Age (y)                                 | 44.0±12.4                                                    | 46.1±12.6     | 47.4±12.7     | 48.6±12.6     |
| <b>Clinical factors</b>                 |                                                              |               |               |               |
| Body surface area (m <sup>2</sup> )     | 2.10±0.17                                                    | 2.10±0.16     | 2.10±0.16     | 2.09±0.16     |
| 24h urine creatinine clearance (mL/min) | 144.1±37.3                                                   | 142.2±32.4    | 142.5±32.8    | 142.3±33.9    |
| Serum creatinine (µmol/L)               | 83.6±10.4                                                    | 82.9±10.3     | 82.1±10.1     | 80.6±10.1     |
| eGFR (mL/min/1.73 m <sup>2</sup> )      | 97.1±14.6                                                    | 96.4±14.3     | 96.3±14.0     | 96.9±13.7     |
| BMI (kg/m <sup>2</sup> )                | 26.6±3.7                                                     | 26.5±3.6      | 26.4±3.5      | 26.0±3.5      |
| Weight (kg)                             | 88.4±13.4                                                    | 88.2±13.0     | 88.1±12.7     | 87.2±12.9     |
| Waist circumference (cm)                | 95.6±10.7                                                    | 95.5±10.5     | 95.3±10.3     | 94.5±10.5     |
| Cholesterol (mmol/L)                    | 5.1±1.0                                                      | 5.2±1.0       | 5.2±1.0       | 5.2±1.0       |
| Triglycerides (mmol/L)                  | 1.4±1.0                                                      | 1.4±1.0       | 1.4±0.9       | 1.3±0.9       |
| Diabetes (%)                            | 3.3                                                          | 3.3           | 4.0           | 3.7           |
| Hypertension (%)                        | 20.1                                                         | 19.2          | 20.9          | 20.6          |
| Cardiovascular disease (%)              | 3.9                                                          | 3.7           | 4.3           | 4.5           |
| <b>Health-related behaviors</b>         |                                                              |               |               |               |
| Physical activity (minutes/week)        | 365(120-914)                                                 | 480(165-1087) | 600(212-1350) | 810(270-1560) |
| Smoker (%)                              | 19.9                                                         | 18.0          | 17.1          | 18.2          |



|                                            |            |            |            |            |
|--------------------------------------------|------------|------------|------------|------------|
| Total energy intake (kcal/d)               | 2132±567   | 2260±552   | 2414±580   | 2739±694   |
| Total protein intake (g/day/1000kcal)      | 36.6±5.4   | 35.9±4.8   | 35.8±4.7   | 36.2±5.0   |
| Total carbohydrate intake (g/day/1000kcal) | 111.0±14.3 | 111.9±13.0 | 111.6±13.2 | 111.7±13.7 |
| Total fat intake (g/day/1000kcal)          | 40.2±5.4   | 39.6±5.1   | 39.3±5.4   | 38.8±5.8   |
| <b>Socioeconomic status</b>                |            |            |            |            |
| <b>Education (%)</b>                       |            |            |            |            |
| Low                                        | 25.4       | 26.6       | 28.6       | 31.2       |
| Middle                                     | 40.3       | 39.4       | 37.1       | 35.9       |
| High                                       | 33.9       | 33.6       | 33.8       | 32.3       |
| Unknown/no answer                          | 0.4        | 0.4        | 0.4        | 0.7        |
| <b>Income (%)</b>                          |            |            |            |            |
| Low                                        | 5.2        | 3.4        | 2.9        | 3.5        |
| Middle                                     | 49.0       | 50.7       | 51.0       | 52.0       |
| High                                       | 34.3       | 34.6       | 34.3       | 31.5       |
| Unknown/no answer                          | 11.5       | 11.2       | 11.8       | 12.9       |

---

Data are % , means ± sd or median (IQR 25%-75%)

**Table S6. Risk of a  $\geq 20\%$  eGFR decline according to baseline Mediterranean Diet Score (0-9) by logistic regression**

| <b>Women</b>                 | <b>Diet Score</b> |                  |                  |                    |
|------------------------------|-------------------|------------------|------------------|--------------------|
|                              | <b>0-3</b>        | <b>4-5</b>       | <b>6-9</b>       | <b>P for trend</b> |
| Cases/population             | 1,734/15,537      | 2,101/19,633     | 1,137/10,576     |                    |
| eGFR decline $\geq 20\%$ (%) | 11.2              | 10.7             | 10.8             | 0.353              |
| Model 1                      | 1.00              | 0.96 (0.89-1.02) | 0.97 (0.89-1.05) | 0.420              |
| Model 2                      | 1.00              | 0.95 (0.89-1.02) | 0.96 (0.89-1.04) | 0.369              |
| Model 3                      | 1.00              | 0.95 (0.89-1.02) | 0.96 (0.88-1.04) | 0.324              |
| Model 4                      | 1.00              | 0.95 (0.89-1.02) | 0.96 (0.89-1.04) | 0.376              |
| Model 5                      | 1.00              | 0.95 (0.89-1.02) | 0.95 (0.87-1.03) | 0.163              |

  

| <b>Men</b>                   | <b>Diet Score</b> |                  |                  |                    |
|------------------------------|-------------------|------------------|------------------|--------------------|
|                              | <b>0-3</b>        | <b>4-5</b>       | <b>6-9</b>       | <b>P for trend</b> |
| Cases/population             | 1,007/12,267      | 1,139/13,909     | 492/6,413        |                    |
| eGFR decline $\geq 20\%$ (%) | 8.2               | 8.2              | 7.7              | 0.382              |
| Model 1                      | 1.00              | 0.97 (0.88-1.06) | 0.88 (0.78-0.99) | 0.084              |
| Model 2                      | 1.00              | 0.96 (0.87-1.05) | 0.86 (0.76-0.96) | 0.032              |
| Model 3                      | 1.00              | 0.95 (0.87-1.04) | 0.85 (0.76-0.96) | 0.027              |
| Model 4                      | 1.00              | 0.95 (0.87-1.04) | 0.86 (0.76-0.96) | 0.031              |
| Model 5                      | 1.00              | 0.95 (0.87-1.04) | 0.85 (0.76-0.96) | 0.010              |

Model 1. Adjusted for age and BSA

Model 2. Model 1 plus BMI, waist circumference, cholesterol, triglycerides, diabetes, hypertension and cardiovascular disease

Model 3. Model 2 plus physical activity, smoker, and total energy intake

Model 4. Model 3 plus education and income

Model 5. Model 4 plus baseline eGFR

**Table S7. Risk of CKD incidence according to baseline Mediterranean Diet Score (0-9) by logistic regression**

| <b>Women</b>      | <b>Mediterranean Diet Score</b> |                  |                  | <b>P for trend</b> |
|-------------------|---------------------------------|------------------|------------------|--------------------|
|                   | <b>0-3</b>                      | <b>4-5</b>       | <b>6-9</b>       |                    |
| Cases/population  | 335/15,537                      | 584/19,633       | 343/10,576       |                    |
| CKD incidence (%) | 2.2                             | 3.0              | 3.2              | <0.001             |
| Model 1           | 1.00                            | 0.93 (0.80-1.07) | 0.83 (0.70-0.97) | 0.060              |
| Model 2           | 1.00                            | 0.92 (0.80-1.06) | 0.82 (0.70-0.97) | 0.060              |
| Model 3           | 1.00                            | 0.92 (0.80-1.06) | 0.82 (0.70-0.97) | 0.056              |
| Model 4           | 1.00                            | 0.93 (0.80-1.07) | 0.82 (0.70-0.97) | 0.062              |
| Model 5           | 1.00                            | 0.92 (0.78-1.08) | 0.88 (0.73-1.06) | 0.174              |

  

| <b>Men</b>        | <b>Mediterranean Diet Score</b> |                  |                  | <b>P for trend</b> |
|-------------------|---------------------------------|------------------|------------------|--------------------|
|                   | <b>0-3</b>                      | <b>4-5</b>       | <b>6-9</b>       |                    |
| Cases/population  | 241/12,267                      | 353/13,909       | 216/6,413        |                    |
| CKD incidence (%) | 2.0                             | 2.5              | 3.4              | <0.001             |
| Model 1           | 1.00                            | 0.80 (0.67-0.95) | 0.76 (0.62-0.93) | 0.013              |
| Model 2           | 1.00                            | 0.80 (0.68-0.96) | 0.76 (0.62-0.94) | 0.015              |
| Model 3           | 1.00                            | 0.80 (0.66-0.94) | 0.74 (0.61-0.91) | 0.007              |
| Model 4           | 1.00                            | 0.79 (0.66-0.94) | 0.74 (0.60-0.91) | 0.007              |
| Model 5           | 1.00                            | 0.86 (0.70-1.05) | 0.87 (0.69-1.10) | 0.243              |

Model 1. Adjusted for age and BSA

Model 2. Model 1 plus BMI, waist circumference, cholesterol, triglycerides, diabetes, hypertension and cardiovascular disease

Model 3. Model 2 plus physical activity, smoker, and total energy intake

Model 4. Model 3 plus education and income

Model 5. Model 4 plus baseline eGFR

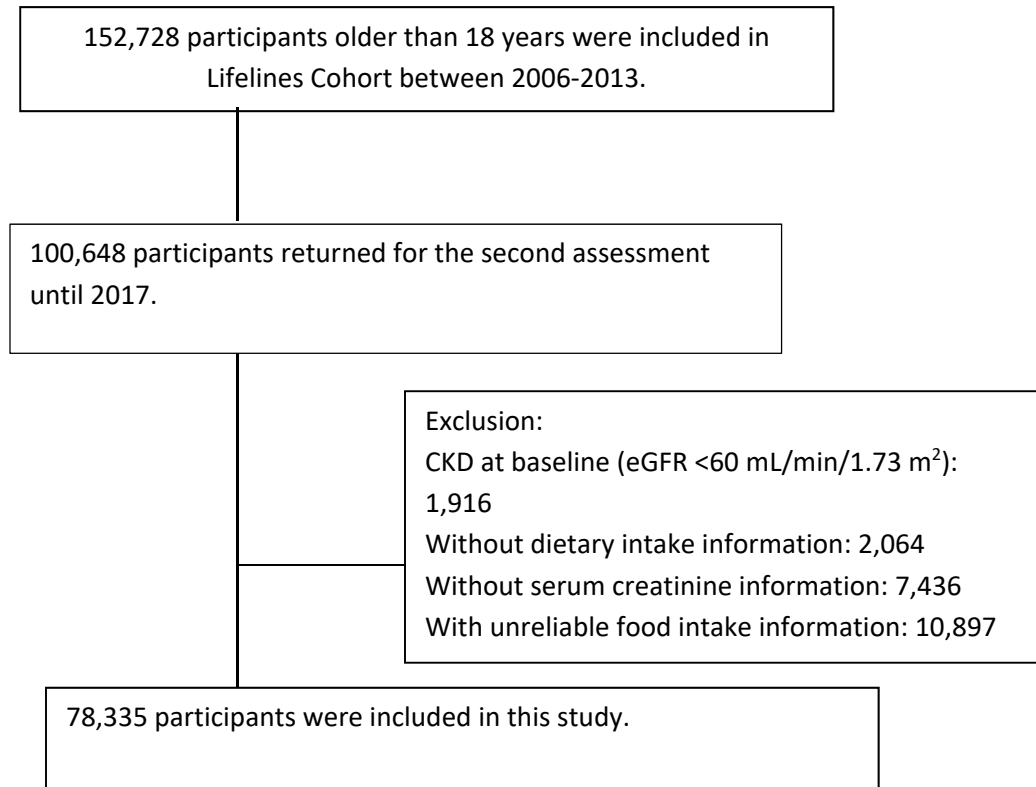

**Figure S1. Flow chart of participant selection**
